# Supplementary material for: New Promising Targets for Synthetic Omptin-Based Peptide Vaccine against Gram-Negative Pathogens
Source: PubMed Central journal article supplement (PMC6630670; doi:10.3390/vaccines7020036), 2019-04-10
Supplement: vaccines-07-00036-s001.pdf [file vaccines-07-00036-s001.pdf]

Article

# New Promising Targets for Synthetic Omptin-Based Peptide Vaccine against Gram-Negative Pathogens

Valentina A. Feodorova <sup>1,\*</sup>, Anna M. Lyapina <sup>1</sup>, Sergey S. Zaitsev <sup>1</sup>, Maria A. Khizhnyakova <sup>1</sup>, Lidiya V. Sayapina <sup>2</sup>, Onega V. Ulianova <sup>1</sup>, Sergey S. Ulyanov <sup>3</sup> and Vladimir L. Motin <sup>4,\*</sup>

Supplementary Materials:

A

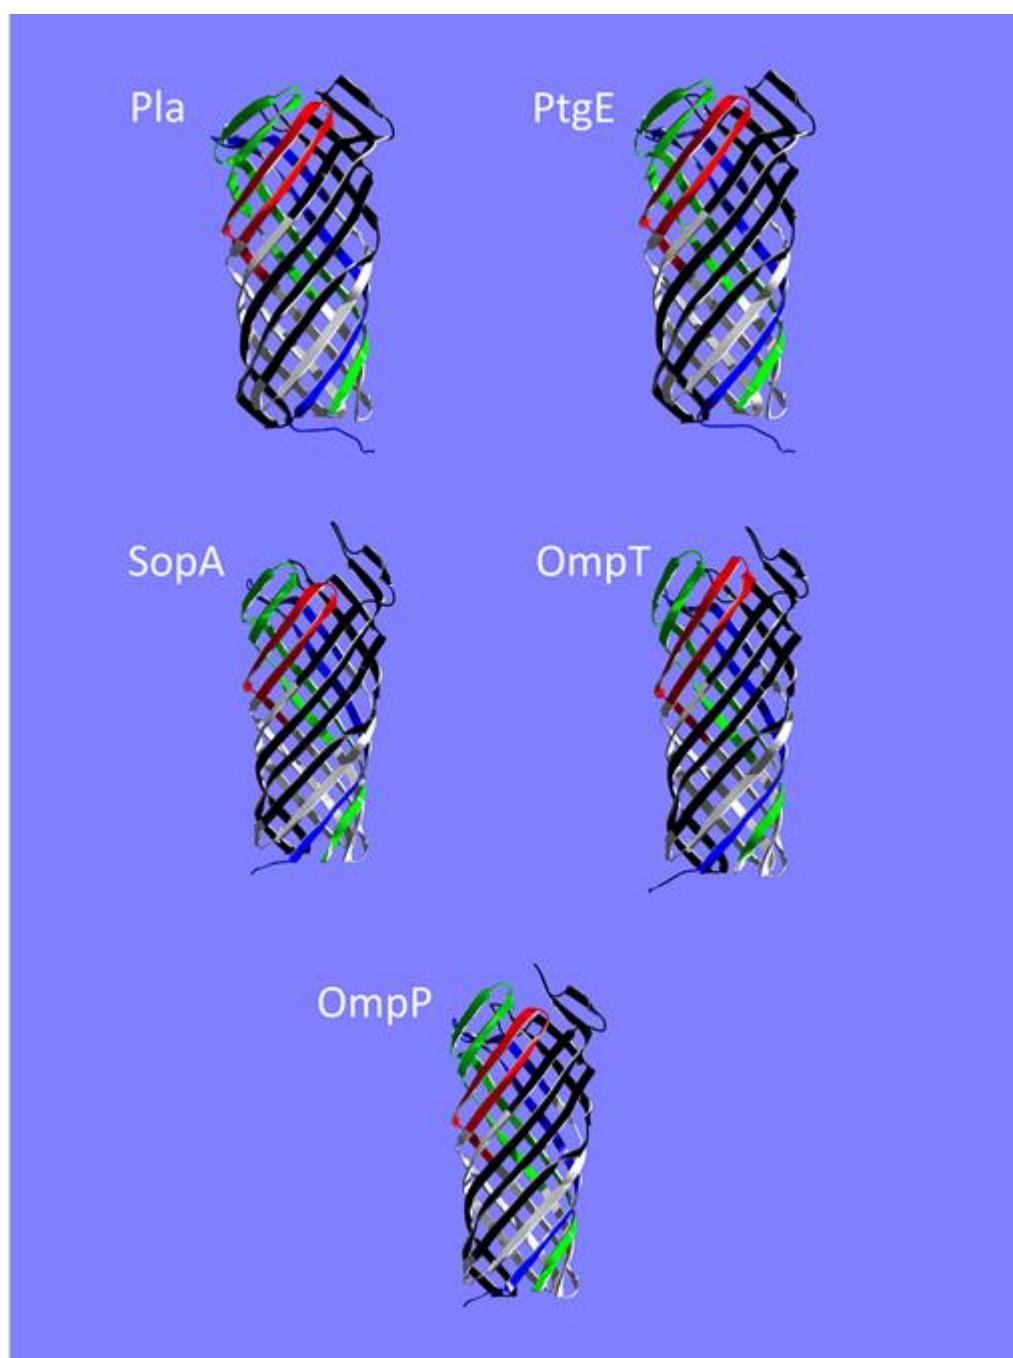

B

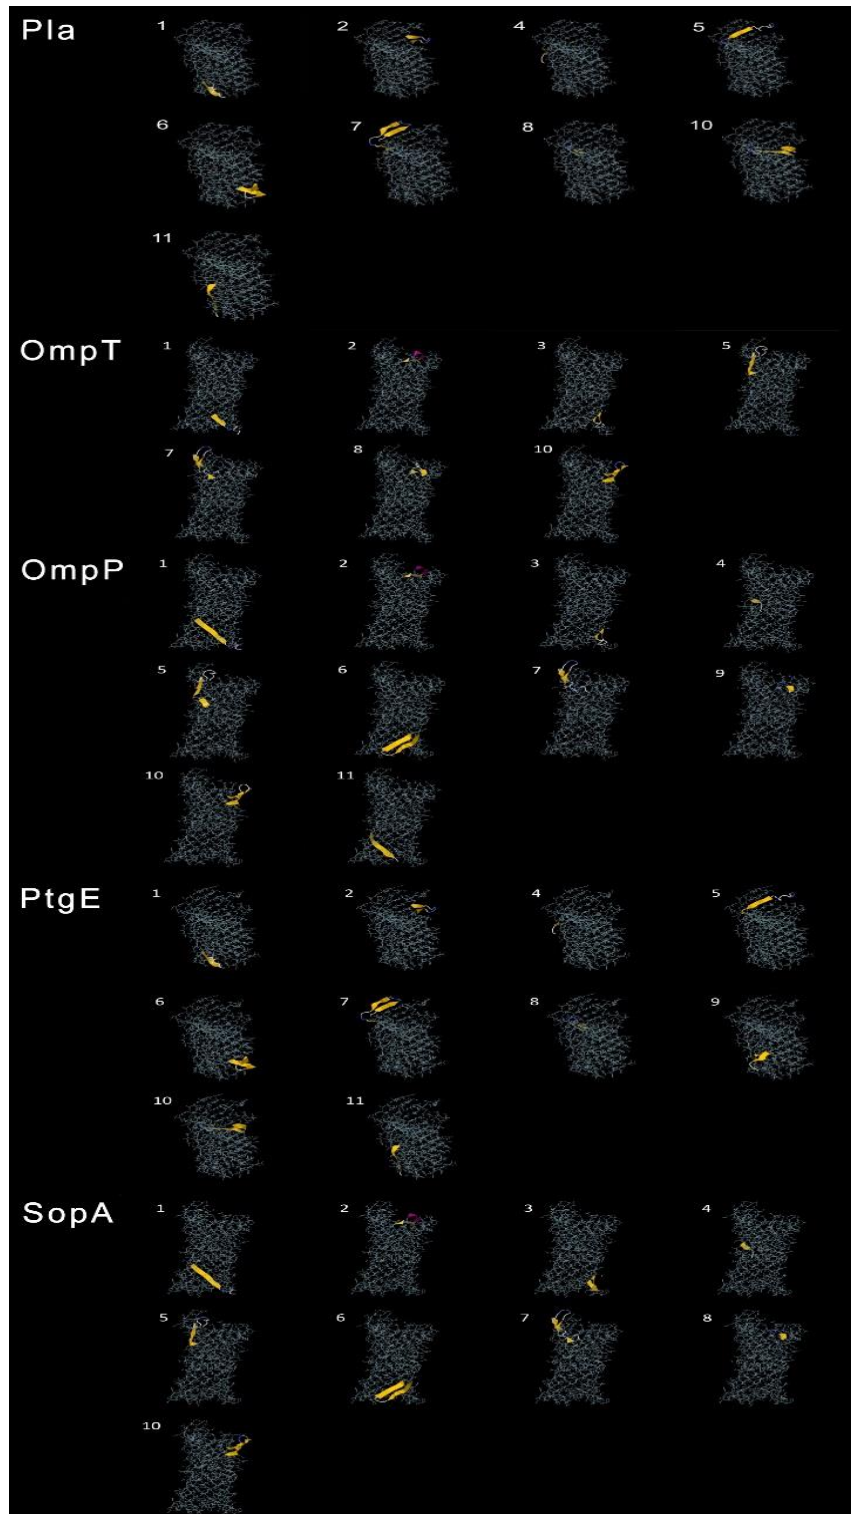

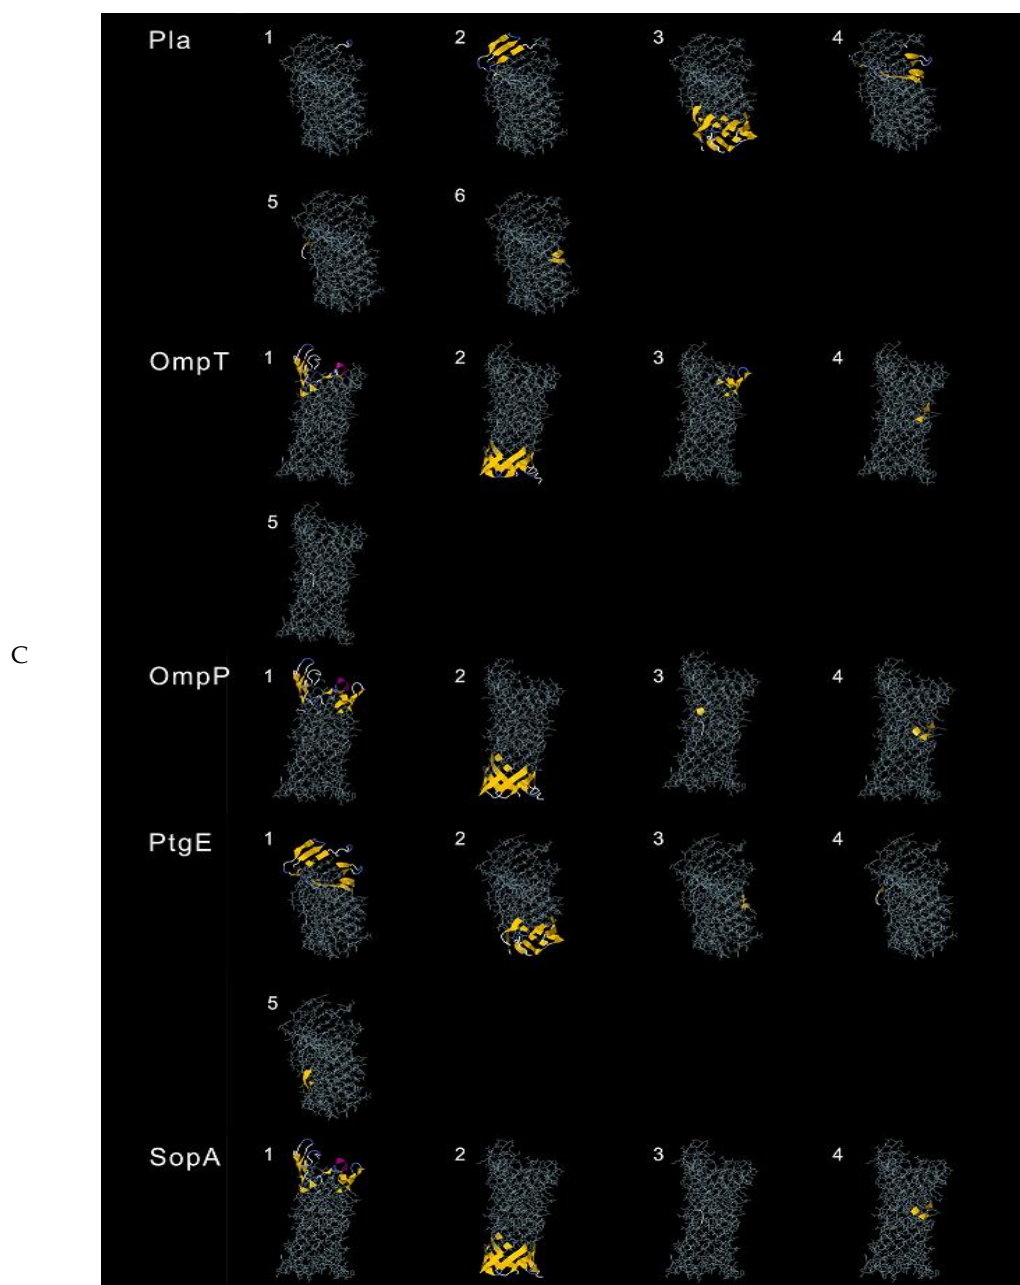

**Figure S1.** Structural 3D ribbon diagrams modeling of omptin protein family based on the: (A) original amino acid sequence of Pla, OmpT, OmpP, PgtE, and SopA. The four immune-reactive clusters colored in blue (epitope no. 1), black (epitope no. 2), red (epitope no. 3), and green (epitope no. 4). All models were generated with Swiss-PdbViewer/DeepView v. 4.1. (B) B-cell linear epitope residues of the Pla, OmpT, OmpP, PgtE, and SopA. (C) B-cell conformational epitope residues of Pla, OmpT, OmpP, PgtE, and SopA.

**Table 1S.** Predicted antigenic and allergenic results of the B-cell linear omptins.

| Epitope No. | Omptin | Epitope Sequence <sup>2</sup> | Allergenicity of the B-Cell Epitope |
|-------------|--------|-------------------------------|-------------------------------------|
| 1           | Pla    | <u>SSQLIPNISPDSFTV</u>        | Non-Allergenic                      |
|             | PgtE   | <u>SALFIPDVSPDSVTT</u>        | Non-Allergenic                      |
|             | SopA   | <u>FIPDNISTDISL</u>           | Non-Allergenic                      |
|             | OmpT   | <u>LSFTPEKIST</u>             | <b>Probable Allergen</b>            |
|             | OmpP   | <u>FGPEKISTEINL</u>           | Non-Allergenic                      |
| 2           | Pla    | <u>YDAETGRKI</u>              | Non-Allergenic                      |
|             | PgtE   | <u>YDTDTRKLL</u>              | Non-Allergenic                      |

|    |      |                                   |                   |
|----|------|-----------------------------------|-------------------|
|    | SopA | <u>HPKEGGR</u>                    | Non-Allergenic    |
|    | OmpT | <u>LPEEKGR</u>                    | Non-Allergenic    |
|    | OmpP | <u>EPEEGGR</u>                    | Non-Allergenic    |
|    | Pla  | -                                 | -                 |
|    | PgtE | -                                 | -                 |
| 3  | SopA | <u>WKLIPKVSF</u>                  | Probable Allergen |
|    | OmpT | <u>WDLLPRVSV</u>                  | Probable Allergen |
|    | OmpP | <u>WELNPWLSV</u>                  | Non-Allergenic    |
|    | Pla  | <u>LASG</u>                       | Non-Allergenic    |
|    | PgtE | <u>LASG</u>                       | Non-Allergenic    |
| 4  | SopA | <u>LGNOK</u>                      | Non-Allergenic    |
|    | OmpT | -                                 | -                 |
|    | OmpP | <u>LNSR</u>                       | Non-Allergenic    |
|    | Pla  | <u>WMNENOSEWTDHSSHPAT</u>         | Non-Allergenic    |
|    | PgtE | <u>WMSSEOPGWTDRSIHPD</u>          | Non-Allergenic    |
| 5  | SopA | <u>WNSNTPOVWTDQSWHPN</u>          | Non-Allergenic    |
|    | OmpT | <u>WLDTSNPGTWTDESKHPN</u>         | Non-Allergenic    |
|    | OmpP | <u>WMDSGTPGTWTDESRHPDTR</u>       | Non-Allergenic    |
|    | Pla  | <u>VKGWLLQDENYKAGI</u>            | Non-Allergenic    |
|    | PgtE | <u>VKGWLLQGDNYKAGV</u>            | Non-Allergenic    |
| 6  | SopA | <u>LKGWLLNNLDYRLGL</u>            | Non-Allergenic    |
|    | OmpT | -                                 | -                 |
|    | OmpP | <u>VKGWFLKESDYRLAI</u>            | Non-Allergenic    |
|    | Pla  | <u>ATGGSYSYNNGAYTGNFPGKVR</u>     | Non-Allergenic    |
|    | PgtE | <u>RGGSYIYDNGRYIGNFPHGVR</u>      | Non-Allergenic    |
| 7  | SopA | <u>MGGSYIYSENGGSRNKKGAHPSGERT</u> | Non-Allergenic    |
|    | OmpT | <u>KGGSYIYSSEGGFRDETGSFPDGER</u>  | Non-Allergenic    |
|    | OmpP | <u>TGGTYIYSENGGFRNETGALPDKIKV</u> | Non-Allergenic    |
|    | Pla  | <u>EHYMRDLT</u>                   | Non-Allergenic    |
|    | PgtE | <u>EHYMRKLT</u>                   | Non-Allergenic    |
| 8  | SopA | <u>YQETETI</u>                    | Non-Allergenic    |
|    | OmpT | <u>YNPEKRIT</u>                   | Non-Allergenic    |
|    | OmpP | <u>YVROTT</u>                     | Non-Allergenic    |
|    | Pla  | -                                 | -                 |
|    | PgtE | <u>GYIITSNAKI</u>                 | Probable Allergen |
| 9  | SopA | -                                 | -                 |
|    | OmpT | -                                 | -                 |
|    | OmpP | <u>AGYYITPEAKVYI</u>              | Probable Allergen |
|    | Pla  | <u>KGGTQOTIDKNSGDSVSIKGDAA</u>    | Non-Allergenic    |
|    | PgtE | <u>KGGTQIIDKTSKTDAYFGGDA</u>      | Non-Allergenic    |
| 10 | SopA | <u>KGDTSLYEQSTNISGTIKNS</u>       | Non-Allergenic    |
|    | OmpT | <u>KGDTSLYSRNLNIDHTKNG</u>        | Non-Allergenic    |
|    | OmpP | <u>KGDTSLYDRSDNTSEHNNNG</u>       | Non-Allergenic    |
|    | Pla  | <u>AGLQYRF</u>                    | Non-Allergenic    |
|    | PgtE | <u>AGLQYRF</u>                    | Probable Allergen |
| 11 | SopA | -                                 | -                 |
|    | OmpT | -                                 | -                 |
|    | OmpP | <u>GTALKYTF</u>                   | Non-allergenic    |

<sup>1</sup> AlgPred<sup>31</sup> (<http://crdd.osdd.net/raghava/algpred/index.html>) and AllerTOP<sup>32</sup> v. 2.0 (<http://www.ddg-pharmfac.net/AllerTOP>) services were used for prediction of allergenicity. <sup>2</sup> B-cell epitopes were predicted by ElliPro (<http://tools.immuneepitope.org/toolsElliPro/>).

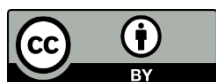

© 2019 by the authors. Submitted for possible open access publication under the terms and conditions of the Creative Commons Attribution (CC BY) license (<http://creativecommons.org/licenses/by/4.0/>).
